# Supplementary material for: Development of diverse aluminium concentration gradient profiles in Ni-rich layered cathodes for enhanced electrochemical and thermal performances
Source: Royal Society of Chemistry journal article supplement (doi:10.1039/d4ta00433g), 2024-01-01
Supplement: d4ta00433g1.pdf [file d4ta00433g1.pdf]

## *Supplementary Information*

# **Development of Diverse Aluminium Concentration Gradient Profiles in Ni-Rich Layered Cathodes for Enhanced Electrochemical and Thermal Performances**

Xinwei Jiao,<sup>a</sup> Junwei Yap,<sup>a</sup> Junbin Choi,<sup>a</sup> Mengyuan Chen,<sup>b</sup> Devendrasinh Darbar,<sup>c</sup> Gongshin Qi,<sup>c</sup>

Xiaosong Huang,<sup>b,\*</sup> and Jung-Hyun Kim<sup>a,\*</sup>

<sup>a</sup>*Department of Mechanical and Aerospace Engineering, The Ohio State University, Columbus, OH 43210, United States.*

<sup>b</sup>*Materials & Manufacturing Systems Research, General Motors Global Research and Development, Warren, MI 48092, United States.*

<sup>c</sup>*Battery Materials and Systems Research, General Motors Global Research and Development, Warren, MI 48092, United States*

Corresponding authors: X. Huang (E-mail: [xiaosong.huang@gm.com](mailto:xiaosong.huang@gm.com)) and J.-H. Kim (E-mail: [kim.6776@osu.edu](mailto:kim.6776@osu.edu))

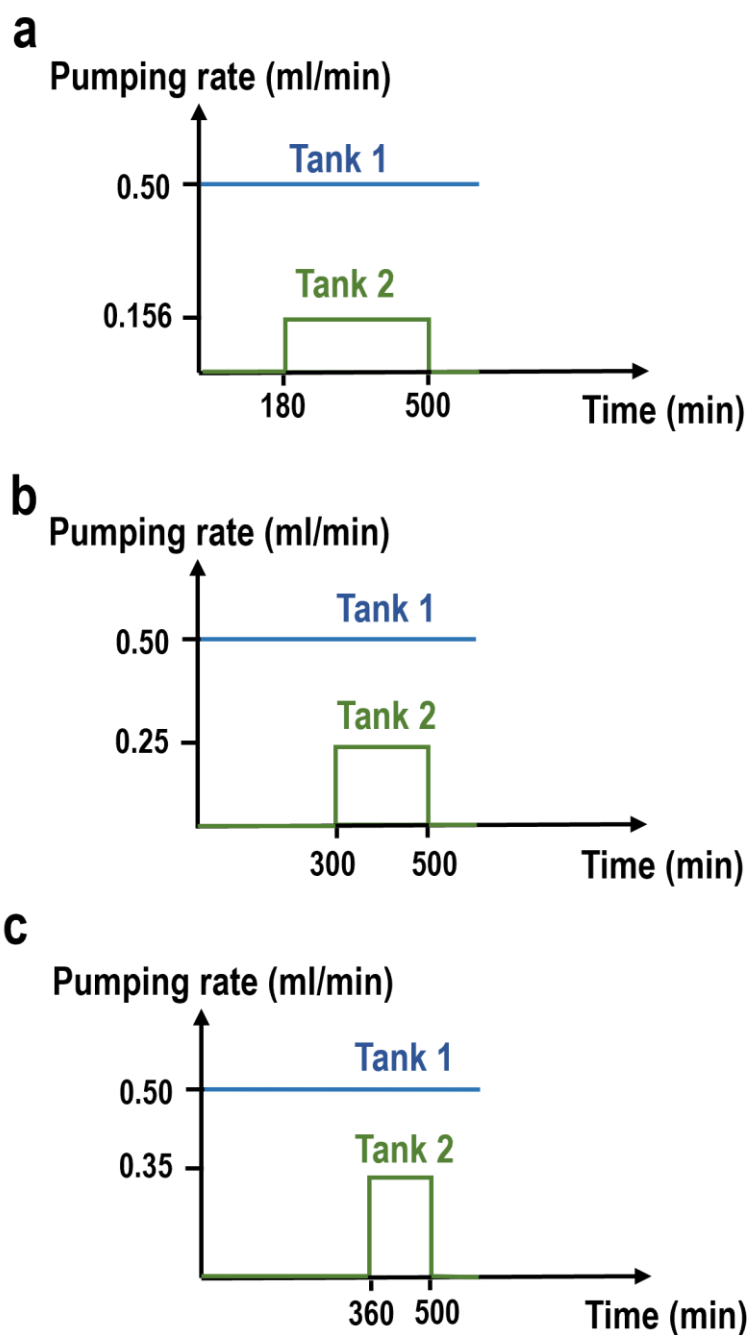

**Fig. S1** The illustration of the injection timing of  $\text{Al}_2(\text{SO}_4)_3 \cdot 12\text{H}_2\text{O}$  solution from Tank 2 (green), into Tank 1 at three different intervals following the initial injection of  $\text{NiSO}_4 \cdot 6\text{H}_2\text{O}$  (blue) at the beginning of the synthesis: after (a) 3 h, (b) 5 h, and (c) 6 h.

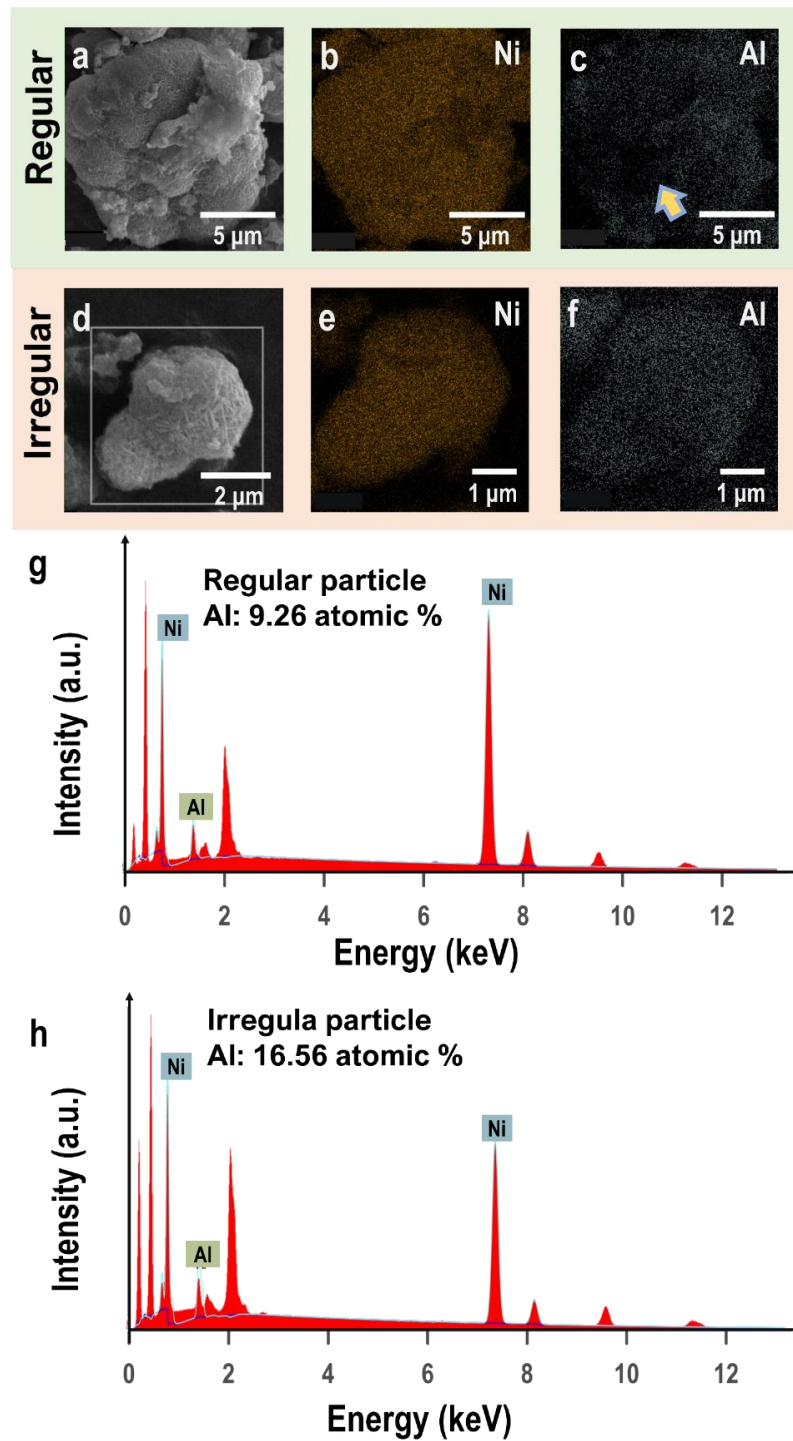

**Fig. S2** SEM and elemental mapping images of (a, b, c) large and (d, e, f) small particles from concentration-gradient  $\text{Ni}_{0.95}(\text{OH})_{1.9} - \text{Al}_{0.05}(\text{OH})_{0.15}$  precursors, obtained by delaying Al-injection schedule to 6 h. EDS spectra obtained from the (g) large particle and (h) small particles.

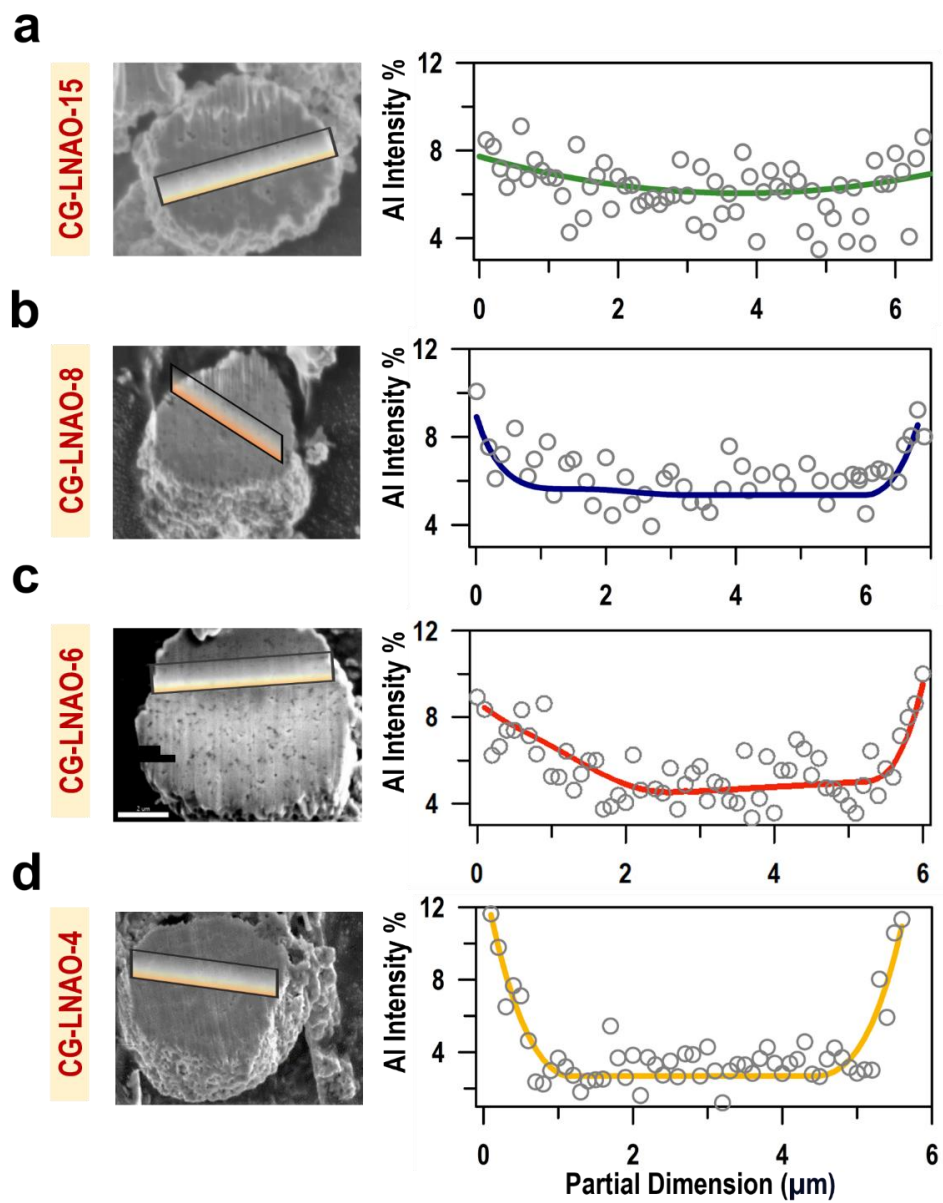

**Fig. S3** Cross-sectional EDS line scan analyses of CG-LNAO particles sintered at 710 °C in O<sub>2</sub> for (a) 15 h, (b) 8 h, (c) 6 h, and (d) 4 h.

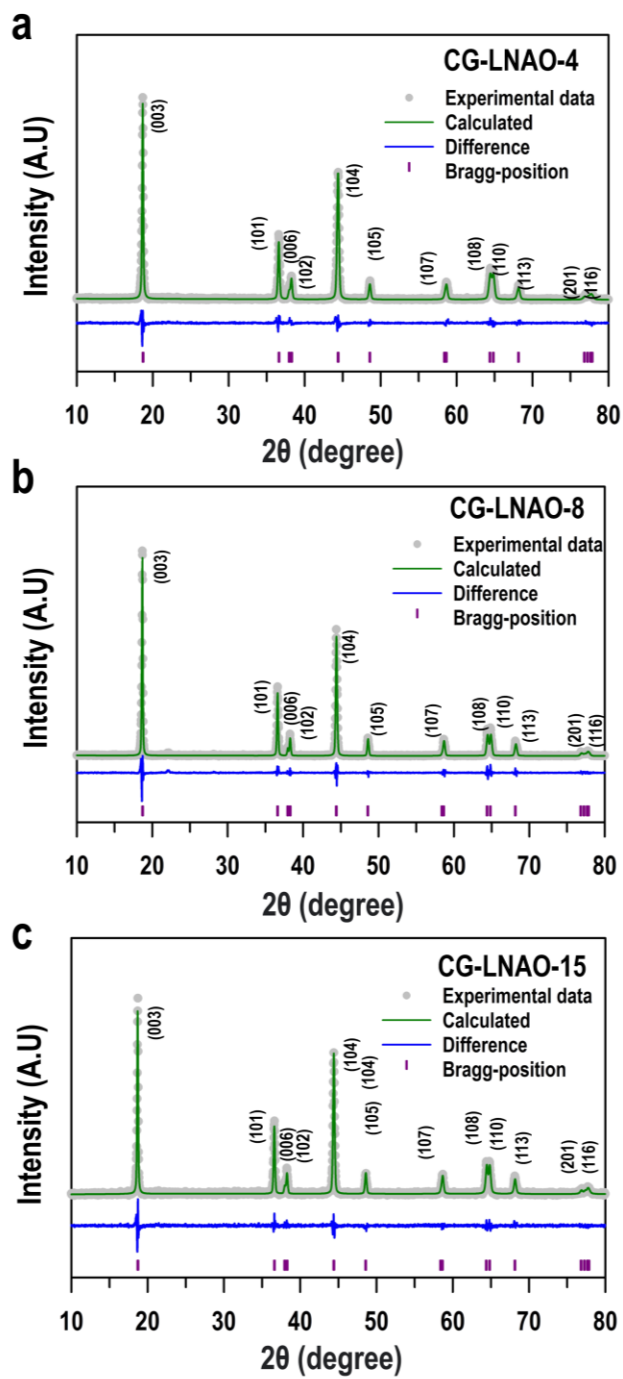

**Fig. S4** XRD data and Rietveld refinement profiles of (a) CG-LNAO-4, (b) CG-LNAO-8, and (c) CG-LNAO-15.

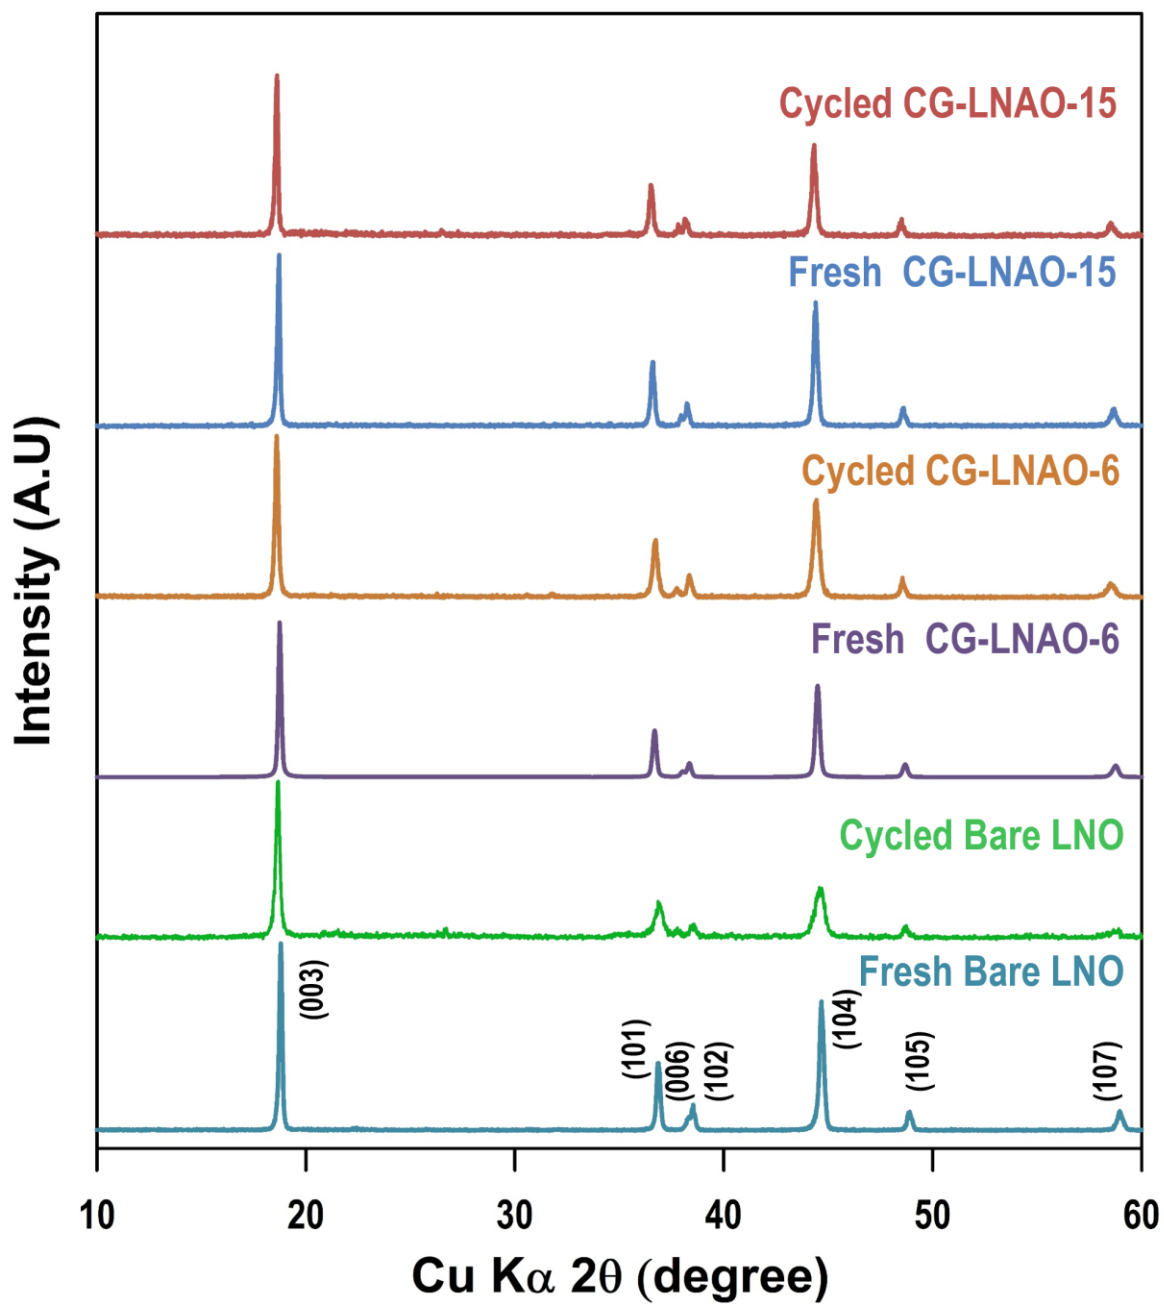

**Fig. S5** XRD pattern of fresh and cycled bare  $\text{LiNiO}_2$ , CG-LNAO-6 and CG-LNAO-15 cathodes.

**Table S1.** Structural parameters of various cathode materials.

| Samples     | a (Å) | c (Å)  | c/a ratio | Unit cell volume (Å <sup>3</sup> ) | Ni <sup>2+</sup> in Li Layer (%) <sup>†</sup> | I <sub>(003)</sub> /I <sub>(104)</sub> Ratio | (R <sub>wp</sub> /R <sub>exp</sub> ) <sup>2</sup> |
|-------------|-------|--------|-----------|------------------------------------|-----------------------------------------------|----------------------------------------------|---------------------------------------------------|
| Bare LNO    | 2.878 | 14.187 | 4.931     | 101.676                            | 4.95                                          | 1.37                                         | 2.12                                              |
| CG-LNAO 4h  | 2.877 | 14.213 | 4.940     | 101.819                            | 2.77                                          | 1.56                                         | 1.85                                              |
| CG-LNAO 6h  | 2.875 | 14.212 | 4.944     | 101.748                            | 2.19                                          | 1.63                                         | 1.33                                              |
| CG-LNAO 8h  | 2.874 | 14.212 | 4.945     | 101.689                            | 2.65                                          | 1.61                                         | 1.68                                              |
| CG-LNAO 15h | 2.877 | 14.211 | 4.939     | 101.761                            | 3.12                                          | 1.41                                         | 1.32                                              |

<sup>†</sup>Referred to as cation mixing.

**Table S2.** Elemental composition of various cathodes measured by ICP-MS.

| Samples      | Li    | Al    | Ni    |
|--------------|-------|-------|-------|
| Bare LNO     | 0.984 | 0.0   | 1.0   |
| CG-LNAO 4 h  | 1.021 | 0.052 | 0.948 |
| CG-LNAO 6 h  | 1.002 | 0.056 | 0.944 |
| CG-LNAO 8 h  | 1.002 | 0.053 | 0.947 |
| CG-LNAO 15 h | 0.986 | 0.060 | 0.940 |
